# Supplementary material for: The weather diaries of the Kirch family: Leipzig, Guben, and Berlin, 1677–1774
Source: Copernicus journal article supplement (doi:10.5194/cp-2023-18), 2023-04-04
Supplement: Supplementary file [file cp-2023-18-AC3-supplement.pdf]

## Reply to reviewer 2

The weather diaries during historical times are important to reconstruct the climate parameters when the instrumental measurement was not started. The paper introduced the history of the weather diaries of the Kirch family and addressed the detailed recording process, unquestionably, this kind of diaries are valuable. If the temperature scale can be converted and keep the homogeneous of the series, that would be great. I just have several minor comments:

In section 2: Is it possible to plot a simple family tree, with year of measurement, and the readers could easily to get the information the year, and who measured? I think it is clearer than reading several paragraphs.

Excellent idea! We will add a figure with family tree, names and measurement periods, there we also indicate the locations (comment by rev. 1).

- In Fig.1 What did the circles mean? if they indicate the area, please mark with unit.

In the caption we wrote: circle area indicates  $n$ , will be changed to: circle area indicates the number of measurements. $n$

- P9-10, the number of figures could be wrong in the text.

The numbers are correct.
